# Supplementary material
Source: publisher figshare collection journal article supplement (https://gsajournals.figshare.com/ndownloader/files/17412932)
Supplement: Supplementary file 1 [file 17412932]

## Sheet: Full Data Sheet
Table S6 Known cold tolerance related gene list
Gene Name	Annotation	Barley ortholog (IPK Gene ID)	Gene_Chr	Gene_Start	GENE_End	Exon_captured	Sequence_ID	Organism	9k_SNPs	SNP annotation	SNP_Chr	SNP_Physical_POS	Notes	Env_ass_fdr0.25	Variables	Env_ass_fdr0.1	Variables	FST_HE_97.5	FST_HL_97.5	FST_LL_97.5	FST_La_97.5	FST_Lo_97.5	FST_El_97.5	FST_Rnb_97.5	GH_97.5	FST_HE_99	FST_HL_99	FST_LL_99	FST_La_99	FST_Lo_99	FST_El_99	FST_Rnb_99	GH_99	Charicterized in Barley	Reference ID	Reference
AtABF1	ABSCISIC ACID-INSENSITIVE 5-like protein 2	HORVU3Hr1G084360	chr3H	607244128	607265565	y	DQ786408	Arabidopsis thaliana	11_21083	noncoding	chr3H	607246092	Within gene	n	NA	n	NA	n	n	n	n	n	n	n	n	n	n	n	n	n	n	n	n	n	doi: 10.1111/j.1399-3054.2005.00601.x	The role of ABF family bZIP class transcription factors instress response
AtABF4	bZIP transcription factor 27	HORVU6Hr1G080670	chr6H	542474736	542480478	y	NM_001203005	Arabidopsis thaliana	SCRI_RS_149401	syn.	chr6H	542476577	Within gene	n	NA	n	NA	n	n	n	n	n	n	n	n	n	n	n	n	n	n	n	n	n	doi: 10.1111/j.1399-3054.2005.00601.x	The role of ABF family bZIP class transcription factors instress response
AtABF4	bZIP transcription factor 27	HORVU6Hr1G080670	chr6H	542474736	542480478	n	NM_001203005	Arabidopsis thaliana	SCRI_RS_169374	noncoding	chr6H	542482959	2481bp upstream of gene	n	NA	n	NA	n	n	n	n	n	n	n	n	n	n	n	n	n	n	n	n	n	doi: 10.1111/j.1399-3054.2005.00601.x	The role of ABF family bZIP class transcription factors instress response
AtABI5	bZIP transcription factor 27	HORVU5Hr1G068230	chr5H	516536711	516540658	y	AY156992	Arabidopsis thaliana	NA	NA	NA	NA	NA	n	NA	n	NA	n	n	n	n	n	n	n	n	n	n	n	n	n	n	n	n	n	12177466	Regulation and Role of the Arabidopsis Abscisic Acid-Insensitive 5 Gene in Abscisic Acid, Sugar, and Stress Response
AtACD5	Ceramide kinase	HORVU6Hr1G062830	chr6H	420832323	420838288	y	NM_001344933.1	Arabidopsis thaliana	SCRI_RS_231835	nonsyn.	chr6H	420836150	Within gene	n	NA	n	NA	n	n	n	n	n	n	n	n	n	n	n	n	n	n	n	n	n	26013074	Evidence for ACD5 ceramide kinase activity involvement in Arabidopsis response to cold stress
AtAOC	allene oxide cyclase 4	HORVU6Hr1G081000	chr6H	543914393	543945473	y	AJ308488.1	Nicotiana tabacum	11_10496	noncoding	chr6H	543914605	Within gene	n	NA	n	NA	n	n	n	n	n	n	n	n	n	n	n	n	n	n	n	n	n	18850307	Allene Oxide Cyclase from Camptotheca acuminata Improves Tolerance Against Low Temperature and Salt Stress in Tobacco and Bacteria
AtCAMTA1	Calmodulin-binding transcription activator 2	HORVU4Hr1G078620	chr4H	608057044	608065707	y	AK228740	Arabidopsis thaliana	SCRI_RS_188944	nonsyn.	chr4H	608059152	Within gene	n	NA	n	NA	n	n	n	n	n	n	n	n	n	n	n	n	n	n	n	n	n	23581962	Roles of CAMTA transcription factors and salicylic acid in configuring the low-temperature transcriptome and freezing tolerance of Arabidopsis.
AtCAMTA2	Calmodulin-binding transcription activator 2	HORVU4Hr1G078620	chr4H	608057044	608065707	y	BT010874	Arabidopsis thaliana	SCRI_RS_188944	nonsyn.	chr4H	608059152	Within gene	n	NA	n	NA	n	n	n	n	n	n	n	n	n	n	n	n	n	n	n	n	n	23581962	Roles of CAMTA transcription factors and salicylic acid in configuring the low-temperature transcriptome and freezing tolerance of Arabidopsis.
AtCAMTA3	Calmodulin-binding transcription activator 2	HORVU4Hr1G078620	chr4H	608057044	608065707	y	AK226486.1	Arabidopsis thaliana	SCRI_RS_188944	nonsyn.	chr4H	608059152	Within gene	n	NA	n	NA	n	n	n	n	n	n	n	n	n	n	n	n	n	n	n	n	n	23581962/28351986	Roles of CAMTA transcription factors and salicylic acid in configuring the low-temperature transcriptome and freezing tolerance of Arabidopsis.
AtCAMTA1	Calmodulin-binding transcription activator 2	HORVU4Hr1G078620	chr4H	608057044	608065707	y	AK228740	Arabidopsis thaliana	SCRI_RS_165236	nonsyn.	chr4H	608061731	Within gene	n	NA	n	NA	n	n	n	n	n	n	n	n	n	n	n	n	n	n	n	n	n	23581962	Roles of CAMTA transcription factors and salicylic acid in configuring the low-temperature transcriptome and freezing tolerance of Arabidopsis.
AtCAMTA2	Calmodulin-binding transcription activator 2	HORVU4Hr1G078620	chr4H	608057044	608065707	y	BT010874	Arabidopsis thaliana	SCRI_RS_165236	nonsyn.	chr4H	608061731	Within gene	n	NA	n	NA	n	n	n	n	n	n	n	n	n	n	n	n	n	n	n	n	n	23581962	Roles of CAMTA transcription factors and salicylic acid in configuring the low-temperature transcriptome and freezing tolerance of Arabidopsis.
AtCAMTA3	Calmodulin-binding transcription activator 2	HORVU4Hr1G078620	chr4H	608057044	608065707	y	AK226486.1	Arabidopsis thaliana	SCRI_RS_165236	nonsyn.	chr4H	608061731	Within gene	n	NA	n	NA	n	n	n	n	n	n	n	n	n	n	n	n	n	n	n	n	n	23581962/28351986	Roles of CAMTA transcription factors and salicylic acid in configuring the low-temperature transcriptome and freezing tolerance of Arabidopsis.
AtCAMTA4	Calmodulin-binding transcription activator 4	HORVU2Hr1G069950	chr2H	493126446	493136309	y	NM_105399.2	Arabidopsis thaliana	NA	NA	NA	NA	NA	n	NA	n	NA	n	n	n	n	n	n	n	n	n	n	n	n	n	n	n	n	n	25039701	A key general stress response motif is regulated non-uniformly by CAMTA transcription factors.
AtCAMTA5	Calmodulin-binding transcription activator 1	HORVU2Hr1G029780	chr2H	107981897	107990517	y	AY128295	Arabidopsis thaliana	NA	NA	NA	NA	NA	n	NA	n	NA	n	n	n	n	n	n	n	n	n	n	n	n	n	n	n	n	n	28351986	Different Cold-Signaling Pathways Function in the Responses to Rapid and Gradual Decreases in Temperature.
AtCAMTA6	Calmodulin-binding transcription activator 5	HORVU2Hr1G051690	chr2H	304347262	304358843	y	AK222107	Arabidopsis thaliana	NA	NA	NA	NA	NA	n	NA	n	NA	n	n	n	n	n	n	n	n	n	n	n	n	n	n	n	n	n	11925432	A novel family of calmodulin-binding transcription activators in multicellular organisms.
AtCBF2	Dehydration-responsive element-binding protein 1B	HORVU5Hr1G080310	chr5H	559687940	559688606	y	AF442489	Arabidopsis thaliana	NA	NA	NA	NA	NA	n	NA	n	NA	n	n	n	n	n	n	n	n	n	n	n	n	n	n	n	n	n	23933884	Jasmonate Regulates the INDUCER OF CBF EXPRESSION–C-REPEAT BINDING FACTOR/DRE BINDING FACTOR1 Cascade and Freezing Tolerance in Arabidopsis
AtCBL1	calcineurin B-like protein 1	HORVU4Hr1G090270	chr5H	644832787	644837545	n	NM_117870	Arabidopsis thaliana	NA	NA	NA	NA	NA	n	NA	n	NA	n	n	n	n	n	n	n	n	n	n	n	n	n	n	n	n	n	10200328	CBL1, a calcium sensor that differentially regulates salt, drought, and cold responses in Arabidopsis
AtCCA1	circadian clock associated 1	HORVU7Hr1G070870	chr7H	385861846	385872384	n	NM_180129.4	Arabidopsis thaliana	SCRI_RS_206751	noncoding	chr7H	385856670	5177bp downstream	n	NA	n	NA	n	n	n	n	n	n	n	n	n	n	n	n	n	n	n	n	n	28351986	Different Cold-Signaling Pathways Function in the Responses to Rapid and Gradual Decreases in Temperature
AtCIPK3	serine/threonine protein kinase 1	HORVU3Hr1G081420	chr3H	594831095	594833921	y	NM_179764	Arabidopsis thaliana	NA	NA	NA	NA	NA	n	NA	n	NA	n	n	n	n	n	n	n	n	n	n	n	n	n	n	n	n	n	12566581	CIPK3, a Calcium Sensor–Associated Protein Kinase That Regulates Abscisic Acid and Cold Signal Transduction in Arabidopsis
AtCIPK7	serine/threonine protein kinase 1	HORVU4Hr1G022630	chr4H	119864078	119866957	y	NM_113200	Arabidopsis thaliana	NA	NA	NA	NA	NA	n	NA	n	NA	n	n	n	n	n	n	n	n	n	n	n	n	n	n	n	n	n	21600398	CIPK7 is involved in cold response by interacting with CBL1 in Arabidopsis thaliana
AtCIR1	At5g37260-like protein	HORVU2Hr1G104580	chr2H	704121765	704124304	y	MLOC_62877.1	Hordeum vulgare subsp. vulgare	NA	NA	NA	NA	NA	n	NA	n	NA	n	n	n	n	n	n	n	n	n	n	n	n	n	n	n	n	n	24377444	Four distinct types of dehydration stress memory genes in Arabidopsis thaliana
AtCOR15b	<100bp match	NA	NA	NA	NA	NA	L24070.1	Arabidopsis thaliana	NA	NA	NA	NA	NA	n	NA	n	NA	n	n	n	n	n	n	n	n	n	n	n	n	n	n	n	n	n	23933884	Jasmonate Regulates the INDUCER OF CBF EXPRESSION–C-REPEAT BINDING FACTOR/DRE BINDING FACTOR1 Cascade and Freezing Tolerance in Arabidopsis
AtCOR414-TM1	COLD REGULATED 314 INNER MEMBRANE 1	HORVU1Hr1G088780	chr1H	542665354	542668891	y	NM_102679.6	Arabidopsis thaliana	12_10808	syn.	chr1H	542658567	6788bp downstream	n	NA	n	NA	n	n	n	n	n	n	n	n	n	n	n	n	n	n	n	n	n	23933884	Jasmonate Regulates the INDUCER OF CBF EXPRESSION–C-REPEAT BINDING FACTOR/DRE BINDING FACTOR1 Cascade and Freezing Tolerance in Arabidopsis
AtCOR414-TM1	COLD REGULATED 314 INNER MEMBRANE 1	HORVU1Hr1G088780	chr1H	542665354	542668891	n	NM_102679.6	Arabidopsis thaliana	12_31387	noncoding	chr1H	542673808	4917bp upstream of gene	n	NA	n	NA	n	n	n	n	n	n	n	n	n	n	n	n	n	n	n	n	n	23933884	Jasmonate Regulates the INDUCER OF CBF EXPRESSION–C-REPEAT BINDING FACTOR/DRE BINDING FACTOR1 Cascade and Freezing Tolerance in Arabidopsis
AtCOR47	<100bp match	NA	NA	NA	NA	NA	NM_101894.4	Arabidopsis thaliana	NA	NA	NA	NA	NA	n	NA	n	NA	n	n	n	n	n	n	n	n	n	n	n	n	n	n	n	n	n	23933884	Jasmonate Regulates the INDUCER OF CBF EXPRESSION–C-REPEAT BINDING FACTOR/DRE BINDING FACTOR1 Cascade and Freezing Tolerance in Arabidopsis
AtCRLK1	Protein kinase superfamily protein	HORVU7Hr1G073300	chr7H	414469384	414474517	n	NM_001345091	Arabidopsis thaliana	SCRI_RS_164280	noncoding	chr7H	414464525	4860bp downstream	n	NA	n	NA	n	n	n	n	n	n	n	n	n	n	n	n	n	n	n	n	n	20026608	A calcium/calmodulin-regulated member of the receptor-like kinase family confers cold tolerance in plants
AtCYSa	Cysteine proteinase inhibitor 1	HORVU3Hr1G078670	chr3H	579747431	579749278	y	NM_129651.4	Arabidopsis thaliana	11_10628	nonsyn.	chr3H	579748358	Within gene	n	NA	n	NA	n	n	n	n	n	n	n	n	n	n	n	n	n	n	n	n	n	18523728	Two cysteine proteinase inhibitors from Arabidopsis thaliana, AtCYSa and AtCYSb, increasing the salt, drought, oxidation and cold tolerance
AtCYSb	Cysteine proteinase inhibitor 12	HORVU3Hr1G038190	chr3H	219953556	219956556	y	NM_180239.4	Arabidopsis thaliana	11_11086	noncoding	chr3H	219956193	Within gene	n	NA	n	NA	n	n	n	n	n	n	n	n	n	n	n	n	n	n	n	n	n	18523728	Two cysteine proteinase inhibitors from Arabidopsis thaliana, AtCYSa and AtCYSb, increasing the salt, drought, oxidation and cold tolerance
AtDWF4	Cytochrome P450 superfamily protein	HORVU4Hr1G065440	chr4H	545414916	545421575	y	NM_114926.4	Arabidopsis thaliana	NA	NA	NA	NA	NA	n	NA	n	NA	n	n	n	n	n	n	n	n	n	n	n	n	n	n	n	n	n	DOI: 10.1007/s00344-010-9150-3	Overexpression of the Brassinosteroid Biosynthetic Gene AtDWF4 in Arabidopsis Seeds Overcomes Abscisic Acid-induced Inhibition of Germination and Increases Cold Tolerance in Transgenic Seedlings
AtEIN3	Ethylene insensitive 3 family protein	HORVU0Hr1G011440	chrUn	64604060	64605281	n	NM_112968.4	Arabidopsis thaliana	NA	NA	NA	NA	NA	n	NA	n	NA	n	n	n	n	n	n	n	n	n	n	n	n	n	n	n	n	n	23933884	Jasmonate Regulates the INDUCER OF CBF EXPRESSION–C-REPEAT BINDING FACTOR/DRE BINDING FACTOR1 Cascade and Freezing Tolerance in Arabidopsis
AtFRY1	3'(2'),5'-bisphosphate nucleotidase	HORVU5Hr1G034810	chr5H	236571700	236583161	y	AY034894	Arabidopsis thaliana	NA	NA	NA	NA	NA	n	NA	n	NA	n	n	n	n	n	n	n	n	n	n	n	n	n	n	n	n	n	12045276	Cell signaling during cold, drought, and salt stress.
AtGolS3	Hexosyltransferase	HORVU2Hr1G015720	chr2H	34953902	34955593	y	NM_100805.2	Arabidopsis thaliana	NA	NA	NA	NA	NA	n	NA	n	NA	n	n	n	n	n	n	n	n	n	n	n	n	n	n	n	n	n	11846875	Important roles of drought- and cold-inducible genes forgalactinol synthase in stress tolerance in Arabidopsisthaliana
AtHDA6	histone deacetylase 6	HORVU6Hr1G038010	chr6H	192933894	192937786	y	NM_125705.4	Arabidopsis thaliana	NA	NA	NA	NA	NA	n	NA	n	NA	n	n	n	n	n	n	n	n	n	n	n	n	n	n	n	n	n	21329671	Arabidopsis HDA6 is required for freezing tolerance
AtHOS1	E3 ubiquitin-protein ligase HOS1	HORVU4Hr1G011260	chr4H	34707024	34716056	y	NM_129540.5	Arabidopsis thaliana	NA	NA	NA	NA	NA	n	NA	n	NA	n	n	n	n	n	n	n	n	n	n	n	n	n	n	n	n	n	9668134	HOS1, a Genetic Locus Involved in Cold-Responsive Gene Expression in Arabidopsis
AtHOS10	myb domain protein 4	HORVU5Hr1G036900	chr5H	264257919	264259567	y	NM_179418.2	Arabidopsis thaliana	NA	NA	NA	NA	NA	n	NA	n	NA	n	n	n	n	n	n	n	n	n	n	n	n	n	n	n	n	n	15994234	HOS10 encodes an R2R3-type MYB transcription factor essential for cold acclimation in plants
AtHOS15	WD-40 repeat family protei	HORVU2Hr1G053480	chr2H	327883531	327908547	y	NM_126132.4	Arabidopsis thaliana	NA	NA	NA	NA	NA	n	NA	n	NA	n	n	n	n	n	n	n	n	n	n	n	n	n	n	n	n	n	18356294	Involvement of Arabidopsis HOS15 in histone deacetylation and cold tolerance
AtHOS9	WUSCHEL related homeobox 1|	HORVU5Hr1G049190	chr5H	381765624	381766908	y	NM_126211.2	Arabidopsis thaliana	NA	NA	NA	NA	NA	n	NA	n	NA	n	n	n	n	n	n	n	n	n	n	n	n	n	n	n	n	n	15205481	An Arabidopsis homeodomain transcription factor gene, HOS9, mediates cold tolerance through a CBF-independent pathway
AtICE1	Transcription factor ICE1	HORVU7Hr1G074490	chr7H	426247959	426251440	n	AY195621.1	Arabidopsis thaliana	NA	NA	NA	NA	NA	n	NA	n	NA	n	n	n	n	n	n	n	n	n	n	n	n	n	n	n	n	n	12672693	ICE1: a regulator of cold-induced transcriptome and freezing tolerance in Arabidopsis
AtICE12	Aquaporin-like superfamily protein	HORVU2Hr1G038740	chr2H	183517995	183520951	y	NM_129458.3	Arabidopsis thaliana	12_10948	noncoding	chr2H	183518398	Within gene	n	NA	n	NA	n	n	n	n	n	n	n	n	n	n	n	n	n	n	n	n	n	23933884	Jasmonate Regulates the INDUCER OF CBF EXPRESSION–C-REPEAT BINDING FACTOR/DRE BINDING FACTOR1 Cascade and Freezing Tolerance in Arabidopsis
AtICE2	Transcription factor ICE1	HORVU7Hr1G074490	chr7H	426247804	426251440	n	AT1G12860.1	Arabidopsis thaliana	NA	NA	NA	NA	NA	n	NA	n	NA	n	n	n	n	n	n	n	n	n	n	n	n	n	n	n	n	n	19026725	Identification of ICE2, a gene involved in cold acclimation which determines freezing tolerance in Arabidopsis thaliana
AtJAZ1	<100bp match	NA	NA	NA	NA	NA	NM_001332386.1	Arabidopsis thaliana	NA	NA	NA	NA	NA	n	NA	n	NA	n	n	n	n	n	n	n	n	n	n	n	n	n	n	n	n	n	23933884	Jasmonate Regulates the INDUCER OF CBF EXPRESSION–C-REPEAT BINDING FACTOR/DRE BINDING FACTOR1 Cascade and Freezing Tolerance in Arabidopsis
AtJAZ4	<100bp match	NA	NA	NA	NA	NA	NM_103746.3	Arabidopsis thaliana	NA	NA	NA	NA	NA	n	NA	n	NA	n	n	n	n	n	n	n	n	n	n	n	n	n	n	n	n	n	23933884	Jasmonate Regulates the INDUCER OF CBF EXPRESSION–C-REPEAT BINDING FACTOR/DRE BINDING FACTOR1 Cascade and Freezing Tolerance in Arabidopsis
AtKIN1	SWIB/MDM2 domain superfamily protein	HORVU6Hr1G015440	chr6H	34019385	34024407	y	AT5G15960.1	Arabidopsis thaliana	SCRI_RS_149258	noncoding	chr6H	34015518	3868bp downstream	n	NA	n	NA	n	n	n	n	n	n	n	n	n	n	n	n	n	n	n	n	n	23933884	Jasmonate Regulates the INDUCER OF CBF EXPRESSION–C-REPEAT BINDING FACTOR/DRE BINDING FACTOR1 Cascade and Freezing Tolerance in Arabidopsis
AtKIN1	SWIB/MDM2 domain superfamily protein	HORVU6Hr1G015440	chr6H	34019385	34024407	y	AT5G15960.1	Arabidopsis thaliana	11_20936	syn.	chr6H	34020654	Within gene	n	NA	n	NA	n	n	n	n	n	n	n	n	n	n	n	n	n	n	n	n	n	23933884	Jasmonate Regulates the INDUCER OF CBF EXPRESSION–C-REPEAT BINDING FACTOR/DRE BINDING FACTOR1 Cascade and Freezing Tolerance in Arabidopsis
AtKIN1	SWIB/MDM2 domain superfamily protein	HORVU6Hr1G015440	chr6H	34019385	34024407	y	AT5G15960.1	Arabidopsis thaliana	SCRI_RS_115036	syn.	chr6H	34026843	2436bp upstream of gene	n	NA	n	NA	n	n	n	n	n	n	n	n	n	n	n	n	n	n	n	n	n	23933884	Jasmonate Regulates the INDUCER OF CBF EXPRESSION–C-REPEAT BINDING FACTOR/DRE BINDING FACTOR1 Cascade and Freezing Tolerance in Arabidopsis
AtLHY	circadian clock associated 1	HORVU7Hr1G070870	chr7H	385861846	385872384	n	NM_099988.4	Arabidopsis thaliana	SCRI_RS_206751	noncoding	chr7H	385856670	5177bp downstream	n	NA	n	NA	n	n	n	n	n	n	n	n	n	n	n	n	n	n	n	n	n	28351986	Different Cold-Signaling Pathways Function in the Responses to Rapid and Gradual Decreases in Temperature
AtLOS2	Enolase	HORVU5Hr1G002040	chr5H	5791249	5802408	y	NM_129209.4	Arabidopsis thaliana	NA	NA	NA	NA	NA	n	NA	n	NA	n	n	n	n	n	n	n	n	n	n	n	n	n	n	n	n	n	12032082	LOS2, a genetic locus required for cold‐responsive gene transcription encodes a bi‐functional enolase
AtOST1	Protein kinase superfamily protein	HORVU2Hr1G125950	chr2H	762152137	762154679	y	NM_119556.3	Arabidopsis thaliana	12_30378	noncoding	chr2H	762152399	Within gene	n	NA	n	NA	n	n	n	n	n	n	n	n	n	n	n	n	n	n	n	n	n	25669882	OST1 Kinase Modulates Freezing Tolerance by Enhancing ICE1 Stability in Arabidopsis
AtOST1	Protein kinase superfamily protein	HORVU2Hr1G125950	chr2H	762152137	762154679	y	NM_119556.3	Arabidopsis thaliana	SCRI_RS_139737	syn.	chr2H	762152818	Within gene	n	NA	n	NA	n	n	n	n	n	n	n	n	n	n	n	n	n	n	n	n	n	25669882	OST1 Kinase Modulates Freezing Tolerance by Enhancing ICE1 Stability in Arabidopsis
AtPRR5	Protein kinase superfamily protein	HORVU4Hr1G057520	chr4H	482652233	482814473	y	NM_122355	Arabidopsis thaliana	SCRI_RS_123275	noncoding	chr4H	482658647	Within gene	n	NA	n	NA	n	n	n	n	n	n	n	n	n	n	n	n	n	n	n	n	n	23371945	A DEAD box RNA helicase is critical for pre-mRNA splicing, cold-responsive gene regulation, and cold tolerance in Arabidopsis.
AtPRR5	pseudo-response regulator 7	HORVU4Hr1G057550	chr4H	482660348	482666038	y	NM_122355	Arabidopsis thaliana	NA	NA	NA	NA	NA	n	NA	n	NA	n	n	n	n	n	n	n	n	n	n	n	n	n	n	n	n	n	23371945	A DEAD box RNA helicase is critical for pre-mRNA splicing, cold-responsive gene regulation, and cold tolerance in Arabidopsis.
AtRD29A	<100bp match	NA	NA	NA	NA	NA	NM_124610.3	Arabidopsis thaliana	NA	NA	NA	NA	NA	n	NA	n	NA	n	n	n	n	n	n	n	n	n	n	n	n	n	n	n	n	n	23933884	Jasmonate Regulates the INDUCER OF CBF EXPRESSION–C-REPEAT BINDING FACTOR/DRE BINDING FACTOR1 Cascade and Freezing Tolerance in Arabidopsis
AtRD29B	<100bp match	NA	NA	NA	NA	NA	NM_124609.4	Arabidopsis thaliana	NA	NA	NA	NA	NA	n	NA	n	NA	n	n	n	n	n	n	n	n	n	n	n	n	n	n	n	n	n	23933884	Jasmonate Regulates the INDUCER OF CBF EXPRESSION–C-REPEAT BINDING FACTOR/DRE BINDING FACTOR1 Cascade and Freezing Tolerance in Arabidopsis
AtSFR2	beta glucosidase 42	HORVU4Hr1G028910	chr4H	182315069	182332651	y	NM_111527.3	Arabidopsis thaliana	NA	NA	NA	NA	NA	n	NA	n	NA	n	n	n	n	n	n	n	n	n	n	n	n	n	n	n	n	n	15258268	The SENSITIVE TO FREEZING2 Gene, Required for Freezing Tolerance in Arabidopsis thaliana, Encodes a β-Glucosidase
AtSIZ1	E3 SUMO-protein ligase SIZ1	HORVU4Hr1G025080	chr4H	145113473	145123037	y	NM_001345415.1	Arabidopsis thaliana	NA	NA	NA	NA	NA	n	NA	n	NA	n	n	n	n	n	n	n	n	n	n	n	n	n	n	n	n	n	23933884	Jasmonate Regulates the INDUCER OF CBF EXPRESSION–C-REPEAT BINDING FACTOR/DRE BINDING FACTOR1 Cascade and Freezing Tolerance in Arabidopsis
AtSK12	SKP1-like 4	HORVU5Hr1G110850	chr5H	634279099	634279636	y	NM_119612	Arabidopsis thaliana	NA	NA	NA	NA	NA	n	NA	n	NA	n	n	n	n	n	n	n	n	n	n	n	n	n	n	n	n	n	23371945	A DEAD box RNA helicase is critical for pre-mRNA splicing, cold-responsive gene regulation, and cold tolerance in Arabidopsis.
AtSK12	SKP1-like 4	HORVU5Hr1G110770	chr5H	634100712	634101438	y	NM_119612	Arabidopsis thaliana	NA	NA	NA	NA	NA	n	NA	n	NA	n	n	n	n	n	n	n	n	n	n	n	n	n	n	n	n	n	23371945	A DEAD box RNA helicase is critical for pre-mRNA splicing, cold-responsive gene regulation, and cold tolerance in Arabidopsis.
AtSPFH	Stomatin-1	HORVU0Hr1G021000	chrUn	110165703	110169370	n	NM_118894.3	Arabidopsis thaliana	NA	NA	NA	NA	NA	n	NA	n	NA	n	n	n	n	n	n	n	n	n	n	n	n	n	n	n	n	n	23371945	A DEAD box RNA helicase is critical for pre-mRNA splicing, cold-responsive gene regulation, and cold tolerance in Arabidopsis.
BrCOR25	<100bp match	NA	NA	NA	NA	NA	HM187577.1	Brassica napus	NA	NA	NA	NA	NA	n	NA	n	NA	n	n	n	n	n	n	n	n	n	n	n	n	n	n	n	n	n	21104087	A novel cold-regulated gene, COR25, of Brassica napus is involved in plant response and tolerance to cold stress
AtCOR15A	Aquaporin-like superfamily protein	HORVU7Hr1G121250	chr7H	653463509	654284107	n	U01377.1	Arabidopsis thaliana	11_20185	noncoding	chr7H	654030631	Within gene	n	NA	n	NA	n	n	n	n	n	n	n	n	n	n	n	n	n	n	n	n	n	8193295	The 5′-region of Arabidopsis thaliana cor15a has cis-acting elements that confer cold-, drought- and ABA-regulated gene expression
AtCOR15A	Aquaporin-like superfamily protein	HORVU7Hr1G121250	chr7H	653463509	654284107	n	U01377.1	Arabidopsis thaliana	SCRI_RS_214451	nonsyn.	chr7H	654028840	Within gene	n	NA	n	NA	n	n	n	n	n	n	n	n	n	n	n	n	n	n	n	n	n	8193295	The 5′-region of Arabidopsis thaliana cor15a has cis-acting elements that confer cold-, drought- and ABA-regulated gene expression
AtCOR15A	Beta-glucosidase C	HORVU5Hr1G095060	chr5H	597558365	597697772	y	U01377.1	Arabidopsis thaliana	NA	NA	NA	NA	NA	n	NA	n	NA	n	n	n	n	n	n	n	n	n	n	n	n	n	n	n	n	n	8193295	The 5′-region of Arabidopsis thaliana cor15a has cis-acting elements that confer cold-, drought- and ABA-regulated gene expression
AtCOR27	Cold regulated gene 27, putative isoform 2	HORVU4Hr1G077480	chr4H	604517809	604521198	y	MLOC_70331.3	Hordeum vulgare subsp. vulgare	NA	NA	NA	NA	NA	n	NA	n	NA	n	n	n	n	n	n	n	n	n	n	n	n	n	n	n	n	n	27990760	COR27 and COR28 encode nighttime repressors integrating Arabidopsis circadian clock and cold response
AtCOR28	Dehydrin COR410	HORVU6Hr1G064620	chr6H	439397805	439399320	n	MLOC_14884.1	Hordeum vulgare subsp. vulgare	NA	NA	NA	NA	NA	n	NA	n	NA	n	n	n	n	n	n	n	n	n	n	n	n	n	n	n	n	n	27990760	COR27 and COR28 encode nighttime repressors integrating Arabidopsis circadian clock and cold response
GmbZIP44	undescribed protein	HORVU6Hr1G017710	chr6H	42378404	42380249	y	DQ787032.1	Glycine max	NA	NA	NA	NA	NA	n	NA	n	NA	n	n	n	n	n	n	n	n	n	n	n	n	n	n	n	n	n	18365246	Soybean GmbZIP44, GmbZIP62 and GmbZIP78 genes function as negative regulator of ABA signaling and confer salt and freezing tolerance in transgenic Arabidopsis
GmbZIP62	Nucleolar protein 14	HORVU5Hr1G076110	chr5H	549452570	549460429	y	DQ787039.1	Glycine max	NA	NA	NA	NA	NA	n	NA	n	NA	n	n	n	n	n	n	n	n	n	n	n	n	n	n	n	n	n	18365246	Soybean GmbZIP44, GmbZIP62 and GmbZIP78 genes function as negative regulator of ABA signaling and confer salt and freezing tolerance in transgenic Arabidopsis
GmbZIP62	Fanconi anemia group	HORVU4Hr1G048140	chr4H	387046050	387052045	y	DQ787039.1	Glycine max	NA	NA	NA	NA	NA	n	NA	n	NA	n	n	n	n	n	n	n	n	n	n	n	n	n	n	n	n	n	18365246	Soybean GmbZIP44, GmbZIP62 and GmbZIP78 genes function as negative regulator of ABA signaling and confer salt and freezing tolerance in transgenic Arabidopsis
GmbZIP62	YELLOW STRIPE like 3	HORVU6Hr1G061450	chr6H	411487860	411491463	y	DQ787039.1	Glycine max	SCRI_RS_226342	nonsyn.	chr6H	411490855	Within gene	n	NA	n	NA	n	n	n	n	n	n	n	n	n	n	n	n	n	n	n	n	n	18365246	Soybean GmbZIP44, GmbZIP62 and GmbZIP78 genes function as negative regulator of ABA signaling and confer salt and freezing tolerance in transgenic Arabidopsis
GmbZIP78	Disease resistance protein	HORVU1Hr1G089960	chr1H	545019810	545097427	y	DQ787043.1	Glycine max	NA	NA	NA	NA	NA	n	NA	n	NA	n	n	n	n	n	n	n	n	n	n	n	n	n	n	n	n	n	18365246	Soybean GmbZIP44, GmbZIP62 and GmbZIP78 genes function as negative regulator of ABA signaling and confer salt and freezing tolerance in transgenic Arabidopsis
GmbZIP78	bZIP transcription factor 53	HORVU5Hr1G029130	chr5H	174822011	174841871	y	DQ787043.1	Glycine max	NA	NA	NA	NA	NA	n	NA	n	NA	n	n	n	n	n	n	n	n	n	n	n	n	n	n	n	n	n	18365246	Soybean GmbZIP44, GmbZIP62 and GmbZIP78 genes function as negative regulator of ABA signaling and confer salt and freezing tolerance in transgenic Arabidopsis
GmbZIP78	G-box binding factor 2	HORVU1Hr1G090030	chr1H	545142641	545148406	y	DQ787043.1	Glycine max	NA	NA	NA	NA	NA	n	NA	n	NA	n	n	n	n	n	n	n	n	n	n	n	n	n	n	n	n	n	18365246	Soybean GmbZIP44, GmbZIP62 and GmbZIP78 genes function as negative regulator of ABA signaling and confer salt and freezing tolerance in transgenic Arabidopsis
GsZFP1	zinc finger protein 7	HORVU5Hr1G018830	chr5H	78263945	78265459	y	AM265629.1	Glycine max	NA	NA	NA	NA	NA	n	NA	n	NA	n	n	n	n	n	n	n	n	n	n	n	n	n	n	n	n	n	22160567	GsZFP1, a new Cys2/His2-type zinc-finger protein, is a positive regulator of plant tolerance to cold and drought stress
HvCBF1	Ethylene-responsive transcription factor 4	HORVU0Hr1G016540	chrUn	89030446	89031106	n	MLOC_75886.1	Hordeum vulgare subsp. vulgare	12_11321	syn.	chrUn	89030956	Within gene	n	NA	n	NA	n	n	n	n	n	n	n	n	n	n	n	n	n	n	n	n	y	12151096	An AP2 domain transcription factor HvCBF1 activates expression of cold-responsive genes in barley through interaction with a (G/a)(C/t)CGAC motif.
HvCBF10A	ethylene-responsive element binding factor 13	HORVU5Hr1G080430	chr5H	560586710	560588220	y	AY785882	Hordeum vulgare subsp. vulgare	12_30845	nonsyn.	chr5H	560587361	Within gene	n	NA	n	NA	n	n	n	n	n	n	n	n	n	n	n	n	n	n	n	n	y	16365758	Mapping of barley homologs to genes that regulate low temperature tolerance in Arabidopsis
HvCBF10B	ethylene-responsive element binding factor 13	HORVU5Hr1G080430	chr5H	560586710	560588220	n	AY785885	Hordeum vulgare subsp. vulgare	12_30845	nonsyn.	chr5H	560587361	Within gene	n	NA	n	NA	n	n	n	n	n	n	n	n	n	n	n	n	n	n	n	n	y	16365758	Mapping of barley homologs to genes that regulate low temperature tolerance in Arabidopsis
HvCBF11	Dehydration-responsive element-binding protein 1E	HORVU2Hr1G094780	chr2H	666372179	666374190	y	AY785892.1	Hordeum vulgare subsp. vulgare	NA	NA	NA	NA	NA	n	NA	n	NA	n	n	n	n	n	n	n	n	n	n	n	n	n	n	n	n	y	16365758	Mapping of barley homologs to genes that regulate low temperature tolerance in Arabidopsis
HvCBF12	ethylene responsive element binding factor 6	HORVU5Hr1G080440	chr5H	560627208	560629221	n	DQ095157.1	Hordeum vulgare subsp. vulgare	NA	NA	NA	NA	NA	n	NA	n	NA	n	n	n	n	n	n	n	n	n	n	n	n	n	n	n	n	y	25974368	The cold response of CBF genes in barley is regulated by distinct signaling mechanisms
HvCBF13	C-repeat binding factor 3-like protein	HORVU7Hr1G091560	chr7H	559896532	559897789	n	DQ095158.1	Hordeum vulgare subsp. vulgare	NA	NA	NA	NA	NA	n	NA	n	NA	n	n	n	n	n	n	n	n	n	n	n	n	n	n	n	n	y	16365758	Mapping of barley homologs to genes that regulate low temperature tolerance in Arabidopsis
HvCBF14	Ethylene-responsive element binding factor 14	HORVU5Hr1G080350	chr5H	560195524	560196810	y	DQ095159.1	Hordeum vulgare subsp. vulgare	NA	NA	NA	NA	NA	n	NA	n	NA	n	n	n	n	n	n	n	n	n	n	n	n	n	n	n	n	y	25974368	The cold response of CBF genes in barley is regulated by distinct signaling mechanisms
HvCBF2	Dehydration-responsive element-binding protein 1B	HORVU5Hr1G080310	chr5H	559687940	559688606	n	AF442489.1	Hordeum vulgare subsp. vulgare	NA	NA	NA	NA	NA	n	NA	n	NA	n	n	n	n	n	n	n	n	n	n	n	n	n	n	n	n	y	20213518	CBF gene copy number variation at Frost Resistance-2 is associated with levels of freezing tolerance in temperate-climate cereals.
HvCBF2A	Dehydration-responsive element-binding protein 1B	HORVU5Hr1G080310	chr5H	559687940	559688606	n	AY785843.1	Hordeum vulgare subsp. vulgare	NA	NA	NA	NA	NA	n	NA	n	NA	n	n	n	n	n	n	n	n	n	n	n	n	n	n	n	n	y	23949371	Hv-CBF2A overexpression in barley accelerates COR gene transcript accumulation and acquisition of freezing tolerance during cold acclimation
HvCBF3	C-repeat-binding factor 4	HORVU5Hr1G080420	chr5H	560569796	560571193	y	MLOC_4956.1	Hordeum vulgare subsp. vulgare	SCRI_RS_165236	nonsyn.	chr4H	608061731	Within gene	n	NA	n	NA	n	n	n	n	n	n	n	n	n	n	n	n	n	n	n	n	y	12177491	Barley Cbf3 gene identification, expression pattern, and map location.
HvCBF3	C-repeat-binding factor 4	HORVU5Hr1G080420	chr5H	560569796	560571193	n	MLOC_4956.1	Hordeum vulgare subsp. vulgare	12_30848	syn.	chr5H	560570414	Within gene	n	NA	n	NA	n	n	n	n	n	n	n	n	n	n	n	n	n	n	n	n	y	12177491	Barley Cbf3 gene identification, expression pattern, and map location.
HvCBF4B	Dehydration-responsive element-binding protein 1B	HORVU5Hr1G080300	chr5H	559672545	559673760	y	MLOC_54227.1	Hordeum vulgare subsp. vulgare	12_30850	noncoding	chr5H	559673560	Within gene	n	NA	n	NA	n	n	n	n	n	n	n	n	n	n	n	n	n	n	n	n	y	20213518	CBF gene copy number variation at Frost Resistance-2 is associated with levels of freezing tolerance in temperate-climate cereals.
HvCBF4B	Dehydration-responsive element-binding protein 1B	HORVU5Hr1G080300	chr5H	559672545	559673760	y	MLOC_54227.1	Hordeum vulgare subsp. vulgare	12_30849	syn.	chr5H	559673294	Within gene	n	NA	n	NA	n	n	n	n	n	n	n	n	n	n	n	n	n	n	n	n	y	20213518	CBF gene copy number variation at Frost Resistance-2 is associated with levels of freezing tolerance in temperate-climate cereals.
HvCBF4B	Dehydration-responsive element-binding protein 1B	HORVU5Hr1G080300	chr5H	559672545	559673760	n	MLOC_54227.1	Hordeum vulgare subsp. vulgare	BK_22	nonsyn.	chr5H	559673235	Within gene	n	NA	n	NA	n	n	n	n	n	n	n	n	n	n	n	n	n	n	n	n	y	20213518	CBF gene copy number variation at Frost Resistance-2 is associated with levels of freezing tolerance in temperate-climate cereals.
HvCBF4B	Dehydration-responsive element-binding protein 1B	HORVU5Hr1G080300	chr5H	559672545	559673760	n	MLOC_54227.1	Hordeum vulgare subsp. vulgare	11_11361	nonsyn.	chr5H	559673560	Within gene	n	NA	n	NA	n	n	y	y	n	n	n	n	n	n	y	y	n	n	n	n	y	20213518	CBF gene copy number variation at Frost Resistance-2 is associated with levels of freezing tolerance in temperate-climate cereals.
HvCBF5	Protein kinase superfamily protein	HORVU7Hr1G010490	chr7H	14758425	14791229	y	AY785855.1	Hordeum vulgare subsp. vulgare	SCRI_RS_138238	nonsyn.	chr7H	14771920	Within gene	n	NA	n	NA	n	n	n	n	n	n	n	n	n	n	n	n	n	n	n	n	y	16365758	Mapping of barley homologs to genes that regulate low temperature tolerance in Arabidopsis
HvCBF5	Dehydration-responsive element-binding protein 1C	HORVU7Hr1G010510	chr7H	14789628	14792079	y	AY785855.1	Hordeum vulgare subsp. vulgare	NA	NA	NA	NA	NA	n	NA	n	NA	n	n	n	n	n	n	n	n	n	n	n	n	n	n	n	n	y	16365758	Mapping of barley homologs to genes that regulate low temperature tolerance in Arabidopsis
HvCBF5	Dehydration-responsive element-binding protein 1C	HORVU7Hr1G010430	chr7H	14676272	14836368	y	AY785855.1	Hordeum vulgare subsp. vulgare	11_10841	noncoding	chr7H	14802282	Within gene	n	NA	n	NA	n	n	n	n	n	n	n	n	n	n	n	n	n	n	n	n	y	16365758	Mapping of barley homologs to genes that regulate low temperature tolerance in Arabidopsis
HvCBF6	C-repeat-binding factor 4	HORVU5Hr1G080450	chr5H	560731225	560732948	n	MLOC_63682.1	Hordeum vulgare subsp. vulgare	12_30852	noncoding	chr5H	560732040	Within gene	n	NA	n	NA	n	n	n	n	n	n	n	n	n	n	n	n	n	n	n	n	y	22195587	The effects of cold, light and time of day during low-temperature shift on the expression of CBF6, FpCor14b and LOS2 in Festuca pratensis.
HvCBF6	C-repeat-binding factor 4	HORVU5Hr1G080450	chr5H	560731225	560732948	n	MLOC_63682.1	Hordeum vulgare subsp. vulgare	BK_23	nonsyn.	chr5H	560732721	Within gene	n	NA	n	NA	n	n	n	n	n	n	n	n	n	n	n	n	n	n	n	n	y	22195587	The effects of cold, light and time of day during low-temperature shift on the expression of CBF6, FpCor14b and LOS2 in Festuca pratensis.
HvCBF6	C-repeat-binding factor 4	HORVU5Hr1G080450	chr5H	560731225	560732948	n	MLOC_63682.1	Hordeum vulgare subsp. vulgare	11_20320	nonsyn.	chr5H	560732721	Within gene	n	NA	n	NA	n	n	n	n	n	n	n	n	n	n	n	n	n	n	n	n	y	22195587	The effects of cold, light and time of day during low-temperature shift on the expression of CBF6, FpCor14b and LOS2 in Festuca pratensis.
HvCBF7	Ethylene-responsive transcription factor 1	HORVU6Hr1G062940	chr6H	422385888	422386616	y	AY785866.1	Hordeum vulgare subsp. vulgare	NA	NA	NA	NA	NA	n	NA	n	NA	n	n	n	n	n	n	n	n	n	n	n	n	n	n	n	n	y	16365758	Mapping of barley homologs to genes that regulate low temperature tolerance in Arabidopsis
HvCBF7	Ethylene-responsive transcription factor 1	HORVU0Hr1G030500	chrUn	177249569	177250297	n	AY785866.1	Hordeum vulgare subsp. vulgare	NA	NA	NA	NA	NA	n	NA	n	NA	n	n	n	n	n	n	n	n	n	n	n	n	n	n	n	n	y	16365758	Mapping of barley homologs to genes that regulate low temperature tolerance in Arabidopsis
HvCBF7	Ethylene-responsive transcription factor 1	HORVU0Hr1G018240	chrUn	94553594	94554322	n	AY785866.1	Hordeum vulgare subsp. vulgare	NA	NA	NA	NA	NA	n	NA	n	NA	n	n	n	n	n	n	n	n	n	n	n	n	n	n	n	n	y	16365758	Mapping of barley homologs to genes that regulate low temperature tolerance in Arabidopsis
HvCBF8A	C-repeat binding factor 3-like protein	HORVU2Hr1G025720	chr2H	80404773	80406165	y	AY785868	Hordeum vulgare subsp. vulgare	SCRI_RS_198148	syn.	chr2H	80405044	Within gene	n	NA	n	NA	n	n	n	n	n	n	n	n	n	n	n	n	n	n	n	n	y	16365758	Mapping of barley homologs to genes that regulate low temperature tolerance in Arabidopsis
HvCBF8B	C-repeat binding factor 3-like protein	HORVU2Hr1G025720	chr2H	80404773	80406165	n	AY785871	Hordeum vulgare subsp. vulgare	SCRI_RS_198148	syn.	chr2H	80405044	Within gene	n	NA	n	NA	n	n	n	n	n	n	n	n	n	n	n	n	n	n	n	n	y	16365758	Mapping of barley homologs to genes that regulate low temperature tolerance in Arabidopsis
HvCBF8C	C-repeat binding factor 3-like protein	HORVU2Hr1G041090	chr2H	201117921	201118668	y	AY785875	Hordeum vulgare subsp. vulgare	12_30853	noncoding	chr2H	201118744	76bp upstream of gene	n	NA	n	NA	n	n	n	n	n	n	n	n	n	n	n	n	n	n	n	n	y	16365758	Mapping of barley homologs to genes that regulate low temperature tolerance in Arabidopsis
Hvcdr29	Peroxisomal acyl-coenzyme A oxidase 1	HORVU1Hr1G028510	chr1H	155820981	155824650	y	X84055	Hordeum vulgare subsp. vulgare	NA	NA	NA	NA	NA	n	NA	n	NA	n	n	n	n	n	n	n	n	n	n	n	n	n	n	n	n	y	DOI: 10.1007/BF00022847	Molecular adaptation of barley to cold and drought conditions
Hvcdr29	Peroxisomal acyl-coenzyme A oxidase 1	HORVU1Hr1G028500	chr1H	155618188	155621764	y	X84055	Hordeum vulgare subsp. vulgare	NA	NA	NA	NA	NA	n	NA	n	NA	n	n	n	n	n	n	n	n	n	n	n	n	n	n	n	n	y	DOI: 10.1007/BF00022847	Molecular adaptation of barley to cold and drought conditions
HvCOR14b	Cold-responsive protein Wcor15-A	HORVU2Hr1G099820	chr2H	688529947	688530850	y	AJ512944.1	Hordeum vulgare subsp. vulgare	NA	NA	NA	NA	NA	n	NA	n	NA	n	n	n	n	n	n	n	n	n	n	n	n	n	n	n	n	y	23567863	Transgenic barley lines prove the involvement of TaCBF14 and TaCBF15 in the cold acclimation process and in frost tolerance
HvDhn7	Dehydrin DHN7	HORVU6Hr1G084010	chr6H	553202848	553204093	y	AF181457	Hordeum vulgare subsp. vulgare	SCRI_RS_158871	noncoding	chr6H	553211303	7210bp upstream	n	NA	n	NA	n	n	n	n	n	n	n	n	n	n	n	n	n	n	n	n	y	https://doi.org/10.1007/s001220051189	The barley (Hordeum vulgare subsp. vulgare L.) dehydrin multigene family: sequences, allele types, chromosome assignments, and expression characteristics of 11 Dhn genes of cv Dicktoo
HvDhn7	Dehydrin DHN7	HORVU6Hr1G084010	chr6H	553202848	553204093	n	AF181457	Hordeum vulgare subsp. vulgare	12_31044	noncoding	chr6H	553204175	82bp upstream	n	NA	n	NA	n	n	n	n	n	n	n	n	n	n	n	n	n	n	n	n	y	https://doi.org/10.1007/s001220051189	The barley (Hordeum vulgare subsp. vulgare L.) dehydrin multigene family: sequences, allele types, chromosome assignments, and expression characteristics of 11 Dhn genes of cv Dicktoo
HvDhn7	Dehydrin DHN7	HORVU6Hr1G084010	chr6H	553202848	553204093	n	AF181457	Hordeum vulgare subsp. vulgare	12_31048	noncoding	chr6H	553203851	Within gene	n	NA	n	NA	n	n	n	n	n	n	n	n	n	n	n	n	n	n	n	n	n	https://doi.org/10.1007/s001220051189	The barley (Hordeum vulgare subsp. vulgare L.) dehydrin multigene family: sequences, allele types, chromosome assignments, and expression characteristics of 11 Dhn genes of cv Dicktoo
HvDhn4	Dehydrin DHN4	HORVU6Hr1G083980	chr6H	553165574	553166757	y	AF181454	Hordeum vulgare subsp. vulgare	12_31042	noncoding	chr6H	553019586	Within gene	n	NA	n	NA	n	n	n	n	n	n	n	n	n	n	n	n	n	n	n	n	y	https://doi.org/10.1007/s001220051189	The barley (Hordeum vulgare subsp. vulgare L.) dehydrin multigene family: sequences, allele types, chromosome assignments, and expression characteristics of 11 Dhn genes of cv Dicktoo
HvDhn8	Dehydrin COR410	HORVU6Hr1G064620	chr6H	439397806	439399281	y	AF043093	Hordeum vulgare subsp. vulgare	11_10189	noncoding	chr6H	439399099	Within gene	n	NA	n	NA	y	n	n	n	n	n	n	n	n	n	n	n	n	n	n	n	y	https://doi.org/10.1007/s001220051189	The barley (Hordeum vulgare subsp. vulgare L.) dehydrin multigene family:sequences, allele types, chromosome assignments, and expression characteristics of 11 Dhn genes of cv Dicktoo
HvDhn13	Dehydrin	HORVU6Hr1G083960	chr6H	553017398	553138858	y	EF576119.1	Hordeum vulgare subsp. vulgare	12_31043	noncoding	chr6H	553018533	Within gene	n	NA	n	NA	n	n	n	n	n	n	n	n	n	n	n	n	n	n	n	n	y	https://doi.org/10.1007/s001220051189	The barley (Hordeum vulgare subsp. vulgare L.) dehydrin multigene family:sequences, allele types, chromosome assignments, and expression characteristics of 11 Dhn genes of cv Dicktoo
HvDhn13	Dehydrin	HORVU6Hr1G083960	chr6H	553017398	553138858	n	EF576119.1	Hordeum vulgare subsp. vulgare	SCRI_RS_165236	nonsyn.	chr4H	608061731	Within gene	n	NA	n	NA	n	n	n	n	n	n	n	n	n	n	n	n	n	n	n	n	y	https://doi.org/10.1007/s001220051189	The barley (Hordeum vulgare subsp. vulgare L.) dehydrin multigene family:sequences, allele types, chromosome assignments, and expression characteristics of 11 Dhn genes of cv Dicktoo
HvDhn5	Dehydrin	HORVU6Hr1G083960	chr6H	553017071	553138858	y	AF181455.1	Hordeum vulgare subsp. vulgare	NA	NA	NA	NA	NA	n	NA	n	NA	n	n	n	n	n	n	n	n	n	n	n	n	n	n	n	n	y	25974368	The cold response of CBF genes in barley is regulated by distinct signaling mechanisms
HvHVA1	Late embryogenesis abundant protein 76	HORVU1Hr1G079290	chr1H	522615372	522616624	y	X78205.1	Hordeum vulgare subsp. vulgare	SCRI_RS_230040	nonsyn.	chr1H	522615703	Within gene	n	NA	n	NA	n	n	n	n	n	n	n	n	n	n	n	n	n	n	n	n	y	DOI: 10.1016/j.plantsci.2003.11.023	HVA1, a LEA gene from barley confers dehydration tolerance in transgenic rice (Oryza sativa L.) via cell membrane protection
HvICE2	Transcription factor ICE1	HORVU3Hr1G096460	chr3H	653291986	653295393	y	DQ151537.1	Hordeum vulgare subsp. vulgare	11_20085	noncoding	chr3H	653287342	4645bp downstream	n	NA	n	NA	n	n	n	n	n	n	n	y	n	n	n	n	n	n	n	n	y	16365758	Mapping of barley homologs to genes that regulate low temperature tolerance in Arabidopsis
HvICE2	Transcription factor ICE1	HORVU3Hr1G096460	chr3H	653291986	653295393	n	DQ151537.1	Hordeum vulgare subsp. vulgare	11_11328	noncoding	chr3H	653294646	Within gene	n	NA	n	NA	y	n	n	n	n	y	n	n	y	n	n	n	n	y	n	n	y	16365758	Mapping of barley homologs to genes that regulate low temperature tolerance in Arabidopsis
HvPaf93 protein	Dehydrin COR410	HORVU6Hr1G064620	chr6H	439397805	439399320	n	X84056	Hordeum vulgare subsp. vulgare	NA	NA	NA	NA	NA	n	NA	n	NA	n	n	n	n	n	n	n	n	n	n	n	n	n	n	n	n	n	DOI: 10.1016/0168-9452(94)04043-G	Characterization of two barley genes that respond rapidly to dehydration stress
HvSS1	sucrose synthase 4	HORVU7Hr1G033230	chr7H	67727459	67734472	n	X65871	Arabidopsis thaliana	12_30880	syn.	chr7H	67729137	Within gene	n	NA	n	NA	y	n	n	n	n	n	n	n	n	n	n	n	n	n	n	n	y	21505865	Structure, expression profile and subcellular localisation of four different sucrose synthase genes from barley.
HvSS3	sucrose synthase 3	HORVU4Hr1G049500	chr4H	400917153	400961760	y	FN421447	Arabidopsis thaliana	NA	NA	NA	NA	NA	n	NA	n	NA	n	n	n	n	n	n	n	n	n	n	n	n	n	n	n	n	y	21505865	Structure, expression profile and subcellular localisation of four different sucrose synthase genes from barley.
HvVRN1	alpha-glucan phosphorylase 2	HORVU3Hr1G085380	chr3H	612632346	612643686	y	AF289051.1	Hordeum vulgare subsp. vulgare	NA	NA	NA	NA	NA	n	NA	n	NA	n	n	n	n	n	n	n	n	n	n	n	n	n	n	n	n	y	26941767	Involved in the regulation of vernalization. Acts as transcriptional repressor of FLC, a major target of the vernalization pathway. Binds DNA in vitro in a non-sequence-specific manner.
HvWRKY38	WRKY family transcription factor	HORVU6Hr1G028790	chr6H	115444384	115446684	y	AY541586.1	Hordeum vulgare subsp. vulgare	12_30473	syn.	chr6H	115445291	Within gene	n	NA	n	NA	n	n	n	n	n	n	n	n	n	n	n	n	n	n	n	n	y	23933884	Hv-WRKY38: a new transcription factor involved in cold- and drought-response in barley.
HvZFP16-1	|zinc-finger protein 3	HORVU1Hr1G006920	chr1H	13601615	13602984	y	DQ151539.1	Hordeum vulgare subsp. vulgare	12_30876	nonsyn.	chr1H	13602737	Within gene	n	NA	n	NA	n	n	n	n	n	n	n	n	n	n	n	n	n	n	n	n	y	16365758	Mapping of barley homologs to genes that regulate low temperature tolerance in Arabidopsis
HvZFP16-1	|zinc-finger protein 3	HORVU1Hr1G006920	chr1H	13601615	13602984	n	DQ151539.1	Hordeum vulgare subsp. vulgare	12_30877	noncoding	chr1H	13602909	Within gene	n	NA	n	NA	n	n	n	n	n	n	n	n	n	n	n	n	n	n	n	n	y	16365758	Mapping of barley homologs to genes that regulate low temperature tolerance in Arabidopsis
HvZFP16-2	zinc-finger protein 3	HORVU1Hr1G006910	chr1H	13595584	13597164	y	DQ151543.1	Hordeum vulgare subsp. vulgare	SCRI_RS_189506	syn.	chr1H	13588172	7413bp downstream	n	NA	n	NA	n	n	n	n	n	n	n	n	n	n	n	n	n	n	n	n	y	16365758	Mapping of barley homologs to genes that regulate low temperature tolerance in Arabidopsis
HvZFP16-2	zinc-finger protein 3	HORVU1Hr1G006910	chr1H	13595584	13597164	n	DQ151543.1	Hordeum vulgare subsp. vulgare	11_10030	syn.	chr1H	13590934	4651bp downstream	n	NA	n	NA	n	n	n	n	n	n	n	n	n	n	n	n	n	n	n	n	y	16365758	Mapping of barley homologs to genes that regulate low temperature tolerance in Arabidopsis
OsCDPK13	Calcium-dependent protein kinase family protein	HORVU4Hr1G082790	chr4H	623203962	623213185	y	AB078634.1	Oryza sativa	SCRI_RS_165236	nonsyn.	chr4H	608061731	Within gene	n	NA	n	NA	n	n	n	n	n	n	n	n	n	n	n	n	n	n	n	n	n	15604699	OsCDPK13, a calcium-dependent protein kinase gene from rice, is induced in response to cold and gibberellin
OsCDPK13	Calcium-dependent protein kinase family protein	HORVU4Hr1G082790	chr4H	623203962	623213185	n	AB078634.1	Oryza sativa	SCRI_RS_197256	nonsyn.	chr4H	623210216	Within gene	n	NA	n	NA	n	n	n	n	n	n	n	n	n	n	n	n	n	n	n	n	n	15604699	OsCDPK13, a calcium-dependent protein kinase gene from rice, is induced in response to cold and gibberellin
OsCDPK13	Calcium-dependent protein kinase family protein	HORVU4Hr1G082790	chr4H	623203962	623213185	n	AB078634.1	Oryza sativa	11_10510	syn.	chr4H	623209080	Within gene	n	NA	n	NA	n	n	n	n	n	n	n	n	n	n	n	n	n	n	n	n	n	15604699	OsCDPK13, a calcium-dependent protein kinase gene from rice, is induced in response to cold and gibberellin
OsCDPK7	Calcium-dependent protein kinase family protein	HORVU6Hr1G066470	chr6H	460161859	460166982	y	AB042550.1	Oryza sativa Japonica	NA	NA	NA	NA	NA	n	NA	n	NA	n	n	n	n	n	n	n	n	n	n	n	n	n	n	n	n	n	10929125	Over-expression of a single Ca2+-dependent protein kinase confers both cold and salt/drought tolerance on rice plants
OsCOIN	E3 ubiquitin-protein ligase CHFR	HORVU3Hr1G014190	chr3H	32482741	32487800	y	AK104280.1	Oryza sativa	SCRI_RS_115423	nonsyn.	chr3H	32487232	Within gene	n	NA	n	NA	n	n	n	n	n	n	n	n	n	n	n	n	n	n	n	n	n	17549515	Overexpression of OsCOIN, a putative cold inducible zinc finger protein, increased tolerance to chilling, salt and drought, and enhanced proline level in rice
OsCOLD1	Golgi pH regulator	HORVU2Hr1G101760	chr2H	694652611	694657653	y	AK318606.1	Oryza sativa	NA	NA	NA	NA	NA	n	NA	n	NA	n	n	n	n	n	n	n	n	n	n	n	n	n	n	n	n	n	25728666	COLD1 confers chilling tolerance in rice
OsDREB1F	C-repeat-binding factor 4	HORVU5Hr1G041600	chr5H	315965929	315966515	n	AY785897.1	Oryza sativa	NA	NA	NA	NA	NA	n	NA	n	NA	n	n	n	n	n	n	n	n	n	n	n	n	n	n	n	n	n	18470484	Overexpression of a rice OsDREB1F gene increases salt, drought, and low temperature tolerance in both Arabidopsis and rice
OsGH3-2	Auxin-responsive GH3 family protein	HORVU3Hr1G074230	chr3H	557551444	557555429	y	LOC_Os01g55940.1	Oryza sativa	NA	NA	NA	NA	NA	n	NA	n	NA	n	n	n	n	n	n	n	n	n	n	n	n	n	n	n	n	n	23112280	A GH3 family member, OsGH3-2, modulates auxin and abscisic acid levels and differentially affects drought and cold tolerance in rice
OsiSAP8	Pentatricopeptide repeat-containing protein	HORVU7Hr1G094640	chr7H	576343096	576356690	n	AY345599.2	Oryza sativa	11_21448	noncoding	chr7H	576344998	Within gene	n	NA	n	NA	n	n	n	n	n	n	n	n	n	n	n	n	n	n	n	n		18205020	Overexpression of OsiSAP8, a member of stress associated protein (SAP) gene family of rice confers tolerance to salt, drought and cold stress in transgenic tobacco and rice
OsiSAP8	Pentatricopeptide repeat-containing protein	HORVU7Hr1G094640	chr7H	576343096	576356690	n	AY345599.2	Oryza sativa	SCRI_RS_148722	noncoding	chr7H	576345779	Within gene	n	NA	n	NA	y	n	n	n	n	y	n	n	y	n	n	n	n	y	n	n	n	18205020	Overexpression of OsiSAP8, a member of stress associated protein (SAP) gene family of rice confers tolerance to salt, drought and cold stress in transgenic tobacco and rice
OsMYB2	MYB-like 102	HORVU7Hr1G057410	chr7H	250171115	250172517	n	D88618.1	Oryza sativa	NA	NA	NA	NA	NA	n	NA	n	NA	n	n	n	n	n	n	n	n	n	n	n	n	n	n	n	n	n	22301384	A R2R3-type MYB gene, OsMYB2, is involved in salt, cold, and dehydration tolerance in rice
OsMYB3R-2	myb domain protein 3r-5	HORVU3Hr1G086270	chr3H	616465292	616471659	y	AJ430052.1	Oryza sativa	NA	NA	NA	NA	NA	n	NA	n	NA	n	n	n	n	n	n	n	n	n	n	n	n	n	n	n	n	n	17293435	Overexpression of an R1R2R3 MYB Gene, OsMYB3R-2, Increases Tolerance to Freezing, Drought, and Salt Stress in Transgenic Arabidopsis
Osmyb4	MYB-related transcription factor	HORVU2Hr1G089270	chr2H	638193398	638194781	y	X99973	Hordeum vulgare subsp. vulgare	NA	NA	NA	NA	NA	n	NA	n	NA	n	n	n	n	n	n	n	n	n	n	n	n	n	n	n	n	n	14675437	Overexpression of the rice Osmyb4 gene increases chilling and freezing tolerance of Arabidopsis thaliana plants
OsMYBS3	myb-like transcription factor family protein	HORVU1Hr1G056020	chr1H	410438726	410442190	y	AY151044.1	Oryza sativa	SCRI_RS_1445	syn.	chr1H	410433523	5204bp downstream	n	NA	n	NA	n	n	n	n	n	n	n	n	n	n	n	n	n	n	n	n	n	20130099	A Novel MYBS3-Dependent Pathway Confers Cold Tolerance in Rice
OsOVP1	Pyrophosphate-energized vacuolar membrane proton pump	HORVU7Hr1G115540	chr7H	641783485	641789354	n	AB012765.1	Oryza sativa	11_10550	noncoding	chr7H	641788307	Within gene	n	NA	n	NA	n	n	n	n	n	n	n	n	n	n	n	n	n	n	n	n	n	20974539	OVP1, a Vacuolar H+-translocating inorganic pyrophosphatase (V-PPase), overexpression improved rice cold tolerance
OsOVP1	Pyrophosphate-energized vacuolar membrane proton pump	HORVU7Hr1G115540	chr7H	641783485	641789354	n	AB012765.1	Oryza sativa	SCRI_RS_185445	nonsyn.	chr7H	641793105	3751bp upstream of gene	n	NA	n	NA	n	n	n	n	n	n	n	n	n	n	n	n	n	n	n	n	n	20974539	OVP1, a Vacuolar H+-translocating inorganic pyrophosphatase (V-PPase), overexpression improved rice cold tolerance
OsOVP1	Pyrophosphate-energized vacuolar membrane proton pump	HORVU7Hr1G115540	chr7H	641783485	641789354	n	AB012765.1	Oryza sativa	12_31325	noncoding	chr7H	641798036	8682bp upstream of gene	n	NA	n	NA	n	n	n	n	n	n	n	n	n	n	n	n	n	n	n	n	n	20974539	OVP1, a Vacuolar H+-translocating inorganic pyrophosphatase (V-PPase), overexpression improved rice cold tolerance
OsP5CS2	Gamma-glutamyl phosphate reductase	HORVU1Hr1G072780	chr1H	498975383	498982941	y	D49714.1	Oryza sativa	11_20550	noncoding	chr1H	498975662	Within gene	n	NA	n	NA	n	n	n	n	n	n	n	n	n	n	n	n	n	n	n	n	n	DOI: 10.1016/j.plantsci.2004.04.009	Stress-inducible OsP5CS2 gene is essential for salt and cold tolerance in rice
OsRAN2	RAS-related GTP-binding nuclear protein 2	HORVU0Hr1G030130	chrUn	169014058	169014818	n	AB015972.1	Oryza sativa	NA	NA	NA	NA	NA	n	NA	n	NA	n	n	n	n	n	n	n	n	n	n	n	n	n	n	n	n	n	20825577	OsRAN2, essential for mitosis, enhances cold tolerance in rice by promoting export of intranuclear tubulin and maintaining cell division under cold stress
OsTERF2	Ethylene-responsive transcription factor 1	HORVU5Hr1G062940	chr5H	488461982	488465215	y	AY496704	Oryza sativa	NA	NA	NA	NA	NA	n	NA	n	NA	n	n	n	n	n	n	n	n	n	n	n	n	n	n	n	n	n	21136294	Overexpression of ethylene response factor TERF2 confers cold tolerance in rice seedlings
TaAIDFa	Chromodomain-helicase-DNA-binding protein 5	HORVU3Hr1G017950	chr3H	46482481	46494788	y	AY781361	Triticum aestivum	BK_24	nonsyn.	chr3H	46483708	Within gene	n	NA	n	NA	n	n	n	n	n	n	n	n	n	n	n	n	n	n	n	n	n	18800227	Characterization of the TaAIDFa gene encoding a CRT/DRE-binding factor responsive to drought, high-salt, and cold stress in wheat
TaCBF14	Ethylene-responsive element binding factor 14	HORVU5Hr1G080350	chr5H	560195524	560196810	n	AY785901.1	Triticum aestivum	NA	NA	NA	NA	NA	n	NA	n	NA	n	n	n	n	n	n	n	n	n	n	n	n	n	n	n	n	n	23567863	Transgenic bar- ley lines prove the involvement of TaCBF14 and TaCBF15 in the cold acclimation process and in frost tolerance.
TaCBF15	C-repeat-binding factor 4	HORVU5Hr1G080380	chr5H	560426643	560427915	y	MH264449.1	Triticum aestivum	NA	NA	NA	NA	NA	n	NA	n	NA	n	n	n	n	n	n	n	n	n	n	n	n	n	n	n	n	n	23567863	Transgenic bar- ley lines prove the involvement of TaCBF14 and TaCBF15 in the cold acclimation process and in frost tolerance.
TaWCI 16	Cold induced 16	HORVU3Hr1G030150	chr3H	142551260	142552617	y	AK376342.1	Hordeum vulgare subsp. vulgare	11_10380	noncoding	chr3H	142551916	Within gene	y	bio6	n	NA	n	n	n	n	n	n	n	n	n	n	n	n	n	n	n	n	n	24265272	dentification of a novel LEA protein involved in freezing tolerance in wheat.
Tawcor14	Cold-responsive protein Wcor15-A	HORVU2Hr1G099820	chr2H	688529947	688530850	n	FJ605270.1	Triticum aestivum	NA	NA	NA	NA	NA	n	NA	n	NA	n	n	n	n	n	n	n	n	n	n	n	n	n	n	n	n	n	10846621	A cold-responsive wheat (Triticum aestivum L.) gene wcor14 identified in a winter-hardy cultivar ‘Mironovska 808’
TaWCOR410	Dehydrin COR410	HORVU6Hr1G064620	chr6H	439397806	439399281	n	U73210	Triticum aestivum	11_10189	noncoding	chr6H	439399099	Within gene	n	NA	n	NA	n	n	n	n	n	n	n	n	n	n	n	n	n	n	n	n	n	17168885	Overexpression of the acidic dehydrin WCOR410 improves freezing tolerance in transgenic strawberry leaves
VpPUB24	U-box domain-containing protein	HORVU6Hr1G089590	chr6H	570107769	570109318	y	Vitis vinifera	Vitis vinifera	NA	NA	NA	NA	NA	n	NA	n	NA	n	n	n	n	n	n	n	n	n	n	n	n	n	n	n	n	n	28486617	VpPUB24, a novel gene from Chinese grapevine, Vitis pseudoreticulata, targets VpICE1 to enhance cold tolerance
VpPUB24	U-box domain-containing protein	HORVU6Hr1G089560	chr6H	570052385	570053961	y	Vitis vinifera	Vitis vinifera	NA	NA	NA	NA	NA	n	NA	n	NA	n	n	n	n	n	n	n	n	n	n	n	n	n	n	n	n	n	28486617	VpPUB24, a novel gene from Chinese grapevine, Vitis pseudoreticulata, targets VpICE1 to enhance cold tolerance
ZmCPK1	calcium-dependent protein kinase 2	HORVU4Hr1G019530	chr4H	94469496	94474320	y	NM_001112282.1	Zea mays	SCRI_RS_104669	noncoding	chr4H	94474136	Within gene	n	NA	n	NA	n	n	n	n	n	n	n	n	n	n	n	n	n	n	n	n	n	25052912	ZmCPK1, a calcium‐independent kinase member of the Zea mays CDPK gene family, functions as a negative regulator in cold stress signalling
ZmMKK4	Protein kinase superfamily protein	HORVU7Hr1G031720	chr7H	64739605	64743325	n	NM_001254919.2	Zea mays	NA	NA	NA	NA	NA	n	NA	n	NA	n	n	n	n	n	n	n	n	n	n	n	n	n	n	n	n	n	21477122	ZmMKK4, a novel group C mitogen‐activated protein kinase kinase in maize (Zea mays), confers salt and cold tolerance in transgenic Arabidopsis
